# Supplementary material for: A thin-film model for droplet spreading on soft solid substrates
Source: Royal Society of Chemistry journal article supplement (doi:10.1039/d0sm00643b), 2020-01-01
Supplement: d0sm00643b1.pdf [file d0sm00643b1.pdf]

# Supplementary Information for

## A Thin-Film Model for Droplet Spreading on Soft Solid Substrates

Vasileios Charitatos<sup>1</sup> and Satish Kumar<sup>1,2</sup>

<sup>1</sup>Department of Chemical Engineering and Materials Science, University of Minnesota,  
Minneapolis, MN 55455, USA

### Scaled governing equations

Before dropping the higher order terms, the scaled governing equations in the liquid are

$$\epsilon^2 Re \left[ \frac{\partial v_x}{\partial t} + v_x \frac{\partial v_x}{\partial x} + v_z \frac{\partial v_x}{\partial z} \right] = -\frac{\partial p_l}{\partial x} + \left[ \epsilon^2 \frac{\partial^2 v_x}{\partial x^2} + \frac{\partial^2 v_z}{\partial z^2} \right], \quad (1)$$

$$\epsilon^4 Re \left[ \frac{\partial v_z}{\partial t} + v_x \frac{\partial v_z}{\partial x} + v_z \frac{\partial v_z}{\partial z} \right] = -\frac{\partial p_l}{\partial z} + \epsilon^2 \left[ \epsilon^2 \frac{\partial^2 v_z}{\partial x^2} + \frac{\partial^2 v_x}{\partial z^2} \right], \quad (2)$$

$$\frac{\partial v_x}{\partial x} + \frac{\partial v_z}{\partial z} = 0. \quad (3)$$

where  $Re = \rho_l U R_0 / \eta_l$  is the liquid Reynolds number.

In the solid, we have

$$\epsilon^2 Re_m \frac{\partial^2 u_x}{\partial^2 t} = -\frac{\partial p_s}{\partial x} + G \left[ \frac{\partial^2 u_x}{\partial z^2} + \epsilon^2 \frac{\partial^2 u_x}{\partial x^2} \right] + m \frac{\partial}{\partial t} \left[ \frac{\partial^2 u_x}{\partial z^2} + \epsilon^2 \frac{\partial^2 u_x}{\partial x^2} \right] = 0, \quad (4)$$

$$\epsilon^4 Re_m \frac{\partial^2 u_z}{\partial^2 t} = -\frac{\partial p_s}{\partial z} + \epsilon^2 G \left[ \frac{\partial^2 u_z}{\partial z^2} + \epsilon^2 \frac{\partial^2 u_z}{\partial x^2} \right] + \epsilon^2 m \frac{\partial}{\partial t} \left[ \frac{\partial^2 u_z}{\partial z^2} + \epsilon^2 \frac{\partial^2 u_z}{\partial x^2} \right] = 0, \quad (5)$$

$$\frac{\partial u_x}{\partial x} + \frac{\partial u_z}{\partial z} = 0, \quad (6)$$

where  $Re_m = (\rho_s / \rho_l) Re$  is a modified Reynolds number,  $G = ER_0 / \sigma \epsilon^3$  is a dimensionless parameter quantifying the ratio of elastic forces to liquid-solid interfacial-tension forces and  $m = \eta_s / \eta_l$  is the viscosity ratio between the solid and liquid phases.

At  $z = -H$  the boundary conditions are

$$u_x = u_z = 0, \quad (7)$$

---

<sup>2</sup>Email address for correspondence: kumar030@umn.edu

$$v_x = v_z = 0. \quad (8)$$

At the liquid-air interface  $z = \zeta(x, t)$ , the kinematic, normal stress, and tangential stress boundary conditions are respectively given by

$$\frac{\partial \zeta}{\partial t} + v_x \frac{\partial \zeta}{\partial x} = v_z, \quad (9)$$

$$\frac{1}{Z} \left[ -\frac{\partial \zeta}{\partial x} \left( -p_l + 2\epsilon^2 \frac{\partial v_x}{\partial x} \right) + \left( \frac{\partial v_x}{\partial z} + \epsilon^2 \frac{\partial v_z}{\partial x} \right) \right] = -\frac{C_l^{-1}}{Z^4} \frac{\partial^2 \zeta}{\partial x^2} \frac{\partial \zeta}{\partial x} - \frac{1}{Z} \Pi \frac{\partial \zeta}{\partial x}, \quad (10)$$

$$\frac{1}{Z} \left[ -\frac{\partial \zeta}{\partial x} \left( \epsilon^2 \frac{\partial v_x}{\partial z} + \epsilon^4 \frac{\partial v_z}{\partial x} \right) + \left( -p_l + 2\epsilon^2 \frac{\partial v_z}{\partial x} \right) + \right] = \frac{C_l^{-1}}{Z^3} \frac{\partial^2 \zeta}{\partial x^2} + \frac{1}{Z} \Pi \quad (11)$$

where  $Z = \sqrt{(1 + \epsilon \partial \zeta / \partial x)^2}$  and  $C_l^{-1} = \epsilon^3 \sigma / \eta_l U$  is a rescaled capillary number based on the liquid-air interfacial tension. Note that due to our choice of characteristic velocity, the magnitude of  $C_l^{-1}$  is equal to unity.

At the liquid-solid interface  $z = \xi(x, t)$ , the continuity-of-velocity, normal stress, and tangential stress boundary conditions are respectively given by

$$\frac{\partial u_x}{\partial t} \Big|_{z=0} = v_x \Big|_{z=\xi}, \quad (12)$$

$$\frac{\partial u_z}{\partial t} \Big|_{z=0} = v_z \Big|_{z=\xi}, \quad (13)$$

$$\begin{aligned} \frac{1}{\Xi} \left[ -\frac{\partial \xi}{\partial x} \left( -p_l + 2\epsilon^2 \frac{\partial v_x}{\partial x} \right) + \left( \frac{\partial v_x}{\partial z} + \epsilon^2 \frac{\partial v_z}{\partial x} \right) \right] - \frac{1}{\Xi} \left[ -\frac{\partial \xi}{\partial x} \left( -p_s + 2G\epsilon^2 \frac{\partial u_x}{\partial x} \right. \right. \\ \left. \left. + 2m\epsilon^2 \frac{\partial}{\partial t} \frac{\partial u_x}{\partial x} \right) + G \left( \frac{\partial u_x}{\partial z} + \epsilon^2 \frac{\partial u_z}{\partial x} \right) + m \frac{\partial}{\partial t} \left( \frac{\partial u_x}{\partial z} + \epsilon^2 \frac{\partial u_z}{\partial x} \right) \right] = \frac{C_s^{-1}}{\Xi^4} \frac{\partial^2 \xi}{\partial x^2} \frac{\partial \xi}{\partial x} \end{aligned} \quad (14)$$

$$\begin{aligned} \frac{1}{\Xi} \left[ -\frac{\partial \xi}{\partial x} \left( \epsilon^2 \frac{\partial v_x}{\partial z} + \epsilon^4 \frac{\partial v_z}{\partial x} \right) + \left( -p_l + 2\epsilon^2 \frac{\partial v_x}{\partial x} \right) + \right] - \frac{1}{\Xi} \left[ -\frac{\partial \xi}{\partial x} \left\{ G \left( \epsilon^2 \frac{\partial u_x}{\partial z} + \epsilon^4 \frac{\partial u_z}{\partial x} \right) \right. \right. \\ \left. \left. + m\epsilon^2 \frac{\partial}{\partial t} \left( \frac{\partial u_x}{\partial z} + \epsilon^2 \frac{\partial u_z}{\partial x} \right) \right\} + \left( -p_s + 2G\epsilon^2 \frac{\partial u_x}{\partial z} + 2m\epsilon \frac{\partial}{\partial t} \frac{\partial u_x}{\partial z} \right) \right] = -\frac{C_s^{-1}}{\Xi^3} \frac{\partial^2 \xi}{\partial x^2} \end{aligned} \quad (15)$$

where  $\Xi = \sqrt{(1 + \epsilon \partial \xi / \partial x)^2}$  and  $C_s^{-1} = \epsilon^3 \gamma / \eta_l U$  is the rescaled capillary number based on the liquid-solid interfacial tension. Substituting the characteristic velocity  $U = \sigma \epsilon^3 / \eta_l$  leads to  $C_s^{-1} = \gamma / \sigma$ , which is a ratio of the liquid-solid and liquid-air interfacial tensions.

To obtain the leading-order equations, we assume  $\epsilon \rightarrow 0$  in equations (1)-(15). The leading-order equations in the liquid are

$$-\frac{\partial p_l}{\partial x} + \frac{\partial^2 v_x}{\partial z^2} = 0, \quad (16)$$

$$\frac{\partial p_l}{\partial z} = 0, \quad (17)$$

$$\frac{\partial v_x}{\partial x} + \frac{\partial v_z}{\partial z} = 0. \quad (18)$$

In the solid, we have

$$-\frac{\partial p_s}{\partial x} + G \frac{\partial^2 u_x}{\partial z^2} + m \frac{\partial}{\partial t} \frac{\partial^2 u_x}{\partial z^2} = 0, \quad (19)$$

$$\frac{\partial p_s}{\partial z} = 0, \quad (20)$$

$$\frac{\partial u_x}{\partial x} + \frac{\partial u_z}{\partial z} = 0. \quad (21)$$

At  $z = -H$  the boundary conditions are

$$u_x = u_z = 0, \quad (22)$$

$$v_x = v_z = 0. \quad (23)$$

At the liquid-air interface  $z = \zeta(x, t)$ , the kinematic, normal stress, and tangential stress boundary conditions are respectively given by

$$\frac{\partial \zeta}{\partial t} + v_x \frac{\partial \zeta}{\partial x} = v_z, \quad (24)$$

$$p_l = p_{cap,l} - \Pi, \quad (25)$$

$$\frac{\partial v_x}{\partial z} = 0, \quad (26)$$

where  $p_{cap,l} = -C_l^{-1}(\partial^2 \zeta / \partial x^2)$  is the capillary pressure in the liquid.

At the liquid-solid interface  $z = \xi(x, t)$ , the continuity-of-velocity, normal stress, and tangential stress boundary conditions are respectively given by

$$\frac{\partial u_x}{\partial t} \Big|_{z=0} = v_x \Big|_{z=\xi}, \quad (27)$$

$$\frac{\partial u_z}{\partial t} \Big|_{z=0} = v_z \Big|_{z=\xi}, \quad (28)$$

$$p_s = p_{cap,l} + p_{cap,s}, \quad (29)$$

$$\frac{\partial v_x}{\partial z} - G \frac{\partial u_x}{\partial z} - m \frac{\partial}{\partial t} \frac{\partial u_x}{\partial z} = 0, \quad (30)$$

where  $p_{cap,s} = -C_s^{-1}(\partial^2 \xi / \partial x^2)$  is a capillary-like pressure in the solid.
